# Supplementary material
Source: HighWire-hosted journal article supplement (https://www.biolreprod.org/content/suppl/2011/02/23/biolreprod.110.090019)
Supplement: 90019SupLegend.pdf [file 90019SupLegend.pdf]

Volume 85 Issue 1 | Review of the journal Biology of Reproduction


 


Skip to content


BiolReprod

- Home
- Guides

BiolReprod

Main Menu

- Home
- Guides

# Volume 85, Issue 1, 1 July 2011

## Biology of Reproduction

The full issue is now available at academic.oup.com/biolreprod/issue/85/1  
ISSN 0006-3363  
EISSN 1529-7268

---

## Editorial

### From the Editors. BOR launches the “World of Reproductive Biology”

Author: Bernard Robaire, Bruce Murphy  
*Biology of Reproduction, Volume 85, Issue 1, 1 July 2011, Page 1,*  
https://doi.org/10.1095/biolreprod.85.1.1

---

## World of Reproductive Biology

### World of Reproductive Biology

Author: Charlotte Schubert, Ph.D.  
*Biology of Reproduction, Volume 85, Issue 1, 1 July 2011, Pages 2–3,*  
https://doi.org/10.1095/biolreprod.111.093393

---

## Commentary

### Mammalian Sperm Acrosome Reaction: Where Does It Begin Before Fertilization?

Author: Ryuzo Yanagimachi  
*Biology of Reproduction, Volume 85, Issue 1, 1 July 2011, Pages 4–5,*  
https://doi.org/10.1095/biolreprod.111.092601

### The Inhibitory Control of Oocyte Maturation in the Zebrafish (Danio rerio): The Role of the G Protein-Coupled Estrogen Receptor and Epidermal Growth Factor

Author: Glen Van Der Kraak, Andrea L. Lister  
*Biology of Reproduction, Volume 85, Issue 1, 1 July 2011, Pages 6–8,*  
https://doi.org/10.1095/biolreprod.111.092411

### The Capacitation-Apoptosis Highway: Oxysterols and Mammalian Sperm Function

Author: R. John Aitken  
*Biology of Reproduction, Volume 85, Issue 1, 1 July 2011, Pages 9–12,*  
https://doi.org/10.1095/biolreprod.111.092528

---

## Pregnancy

### Myoepithelial Cell Contraction and Milk Ejection Are Impaired in Mammary Glands of Mice Lacking Smooth Muscle Alpha-Actin

Author: Carol J. Haaksma, Robert J. Schwartz, James J. Tomasek  
*Biology of Reproduction, Volume 85, Issue 1, 1 July 2011, Pages 13–21,*  
https://doi.org/10.1095/biolreprod.110.090639

### Maternal Obesity-Impaired Insulin Signaling in Sheep and Induced Lipid Accumulation and Fibrosis in Skeletal Muscle of Offspring

Author: Xu Yan, Yan Huang, Jun-Xing Zhao, Nathan M. Long, Adam B. Uthlaut …  
*Biology of Reproduction, Volume 85, Issue 1, 1 July 2011, Pages 172–178,*  
https://doi.org/10.1095/biolreprod.110.089649

### Human Cytomegalovirus Is Protected from Inactivation by Reversible Binding to Villous Trophoblasts

Author: Ashley Davey, Lauren Eastman, Priyanka Hansraj, Denise G. Hemmings  
*Biology of Reproduction, Volume 85, Issue 1, 1 July 2011, Pages 198–207,*  
https://doi.org/10.1095/biolreprod.110.088567

---

## Testis

### Manipulation of Estrogen Synthesis Alters MIR202\* Expression in Embryonic Chicken Gonads

Author: Stephanie C. Bannister, Craig A. Smith, Kelly N. Roeszler, Timothy J. Doran, Andrew H. Sinclair …  
*Biology of Reproduction, Volume 85, Issue 1, 1 July 2011, Pages 22–30,*  
https://doi.org/10.1095/biolreprod.110.088476

### Regulation of Cytochrome P450 1B1 Expression by Luteinizing Hormone in Mouse MA-10 and Rat R2C Leydig Cells: Role of Protein Kinase A

Author: Subrata Deb, Stelvio M. Bandiera  
*Biology of Reproduction, Volume 85, Issue 1, 1 July 2011, Pages 89–96,*  
https://doi.org/10.1095/biolreprod.110.088971

### Expression of Mirlet7 Family MicroRNAs in Response to Retinoic Acid-Induced Spermatogonial Differentiation in Mice

Author: Ming-Han Tong, Debra Mitchell, Ryan Evanoff, Michael D. Griswold  
*Biology of Reproduction, Volume 85, Issue 1, 1 July 2011, Pages 189–197,*  
https://doi.org/10.1095/biolreprod.110.089458

### Homologous Recombination in Rat Germline Stem Cells

Author: Mito Kanatsu-Shinohara, Megumi Kato-Itoh, Masahito Ikawa, Masanori Takehashi, Makoto Sanbo …  
*Biology of Reproduction, Volume 85, Issue 1, 1 July 2011, Pages 208–217,*  
https://doi.org/10.1095/biolreprod.111.090837

---

## Embryo

### Characterization and Processing of Superoxide Dismutase-Fused Vitellogenin in the Diapause Embryo Formation: A Special Developmental Pathway in the Brine Shrimp, Artemia parthenogenetica

Author: Su Chen, Dian-Fu Chen, Fan Yang, Hiromichi Nagasawa, Wei-Jun Yang  
*Biology of Reproduction, Volume 85, Issue 1, 1 July 2011, Pages 31–41,*  
https://doi.org/10.1095/biolreprod.110.090340

### Involvement of Mouse Nucleoplasmin 2 in the Decondensation of Sperm Chromatin after Fertilization

Author: Azusa Inoue, Sugako Ogushi, Mitinori Saitou, Masataka G. Suzuki, Fugaku Aoki  
*Biology of Reproduction, Volume 85, Issue 1, 1 July 2011, Pages 70–77,*  
https://doi.org/10.1095/biolreprod.110.089342

---

## Gamete Biology

### Involvement of Epidermal Growth Factor Receptor Signaling in Estrogen Inhibition of Oocyte Maturation Mediated Through the G Protein-Coupled Estrogen Receptor (Gper) in Zebrafish (Danio rerio)

Author: Candace Peyton, Peter Thomas  
*Biology of Reproduction, Volume 85, Issue 1, 1 July 2011, Pages 42–50,*  
https://doi.org/10.1095/biolreprod.110.088765

### Oleic Acid Prevents Detrimental Effects of Saturated Fatty Acids on Bovine Oocyte Developmental Competence

Author: Hilde Aardema, Peter L.A.M. Vos, Francesca Lolicato, Bernard A.J. Roelen, Hiemke M. Knijn …  
*Biology of Reproduction, Volume 85, Issue 1, 1 July 2011, Pages 62–69,*  
https://doi.org/10.1095/biolreprod.110.088815

### Molecular Cloning and Characterization of Phospholipase C Zeta in Equine Sperm and Testis Reveals Species-Specific Differences in Expression of Catalytically Active Protein

Author: S.J. Bedford-Guaus, L.A. McPartlin, J. Xie, S.L. Westmiller, M.G. Buffone …  
*Biology of Reproduction, Volume 85, Issue 1, 1 July 2011, Pages 78–88,*  
https://doi.org/10.1095/biolreprod.110.089466

### Mass Spectrometric Detection of Cholesterol Oxidation in Bovine Sperm

Author: Jos F. Brouwers, Arjan Boerke, Patrícia F.N. Silva, Nuria Garcia-Gil, Renske A. van Gestel …  
*Biology of Reproduction, Volume 85, Issue 1, 1 July 2011, Pages 128–136,*  
https://doi.org/10.1095/biolreprod.111.091207

### Characterization of a Novel Mouse Gene Encoding an SYCP3-Like Protein That Relocalizes from the XY Body to the Nucleolus During Prophase of Male Meiosis I

Author: Makiko Tsutsumi, Hiroshi Kogo, Hiroe Kowa-Sugiyama, Hidehito Inagaki, Tamae Ohye …  
*Biology of Reproduction, Volume 85, Issue 1, 1 July 2011, Pages 165–171,*  
https://doi.org/10.1095/biolreprod.110.087270

### Guanine-Nucleotide Exchange Factors (RAPGEF3/RAPGEF4) Induce Sperm Membrane Depolarization and Acrosomal Exocytosis in Capacitated Stallion Sperm

Author: L.A. McPartlin, P.E. Visconti, S.J. Bedford-Guaus  
*Biology of Reproduction, Volume 85, Issue 1, 1 July 2011, Pages 179–188,*  
https://doi.org/10.1095/biolreprod.110.085555

---

## Toxicology

### In Utero Exposure to the Antiandrogen Di-(2-Ethylhexyl) Phthalate Decreases Adrenal Aldosterone Production in the Adult Rat

Author: Daniel B. Martinez-Arguelles, Theodore Guichard, Martine Culty, Barry R. Zirkin, Vassilios Papadopoulos  
*Biology of Reproduction, Volume 85, Issue 1, 1 July 2011, Pages 51–61,*  
https://doi.org/10.1095/biolreprod.110.089920

---

## Female Reproductive Tract

### Structure and Function of Intercellular Junctions in Human Cervical and Vaginal Mucosal Epithelia

Author: Caitlin D. Blaskewicz, Jeffrey Pudney, Deborah J. Anderson  
*Biology of Reproduction, Volume 85, Issue 1, 1 July 2011, Pages 97–104,*  
https://doi.org/10.1095/biolreprod.110.090423

### Distribution of Aromatase and Sex Steroid Receptors in the Baculum During the Rat Life Cycle: Effects of Estrogen During the Early Development of the Baculum

Author: Tomohiro Yonezawa, Mayuko Higashi, Kazuki Yoshioka, Ken-ichiro Mutoh  
*Biology of Reproduction, Volume 85, Issue 1, 1 July 2011, Pages 105–112,*  
https://doi.org/10.1095/biolreprod.110.089508

### Bidirectional Interaction Between Unfolded-Protein-Response Key Protein HSPA5 and Estrogen Signaling in Human Endometrium

Author: Elif Guzel, Murat Basar, Nehir Ocak, Aydin Arici, Umit A. Kayisli  
*Biology of Reproduction, Volume 85, Issue 1, 1 July 2011, Pages 121–127,*  
https://doi.org/10.1095/biolreprod.110.089532

### Conceptus-Induced Changes in the Endometrial Transcriptome: How Soon Does the Cow Know She Is Pregnant?

Author: N. Forde, F. Carter, T.E. Spencer, F.W. Bazer, O. Sandra …  
*Biology of Reproduction, Volume 85, Issue 1, 1 July 2011, Pages 144–156,*  
https://doi.org/10.1095/biolreprod.110.090019

---

## Ovary

### Identification of a Line of Sheep Carrying a Putative Autosomal Gene Increasing Ovulation Rate in Sheep That Does Not Appear to Interact with Mutations in the Transforming Growth Factor Beta Superfamily

Author: Jennifer L. Juengel, Anne R. O’Connell, Michelle C. French, Luke E. Proctor, Roger Wheeler …  
*Biology of Reproduction, Volume 85, Issue 1, 1 July 2011, Pages 113–120,*  
https://doi.org/10.1095/biolreprod.110.090514

---

## Environment

### The Influence of Genetic and Environmental Factors on the Etiology of the Human Umbilical Cord: The East Flanders Prospective Twin Survey

Author: Evangelia E. Antoniou, Catherine Derom, Evert Thiery, Tom Fowler, Taunton R. Southwood …  
*Biology of Reproduction, Volume 85, Issue 1, 1 July 2011, Pages 137–143,*  
https://doi.org/10.1095/biolreprod.110.088807

---

## Reproductive Technology

### Equine CRISP3 Modulates Interaction Between Spermatozoa and Polymorphonuclear Neutrophils

Author: A. Doty, W.C. Buhi, S. Benson, K.E. Scoggin, M. Pozor …  
*Biology of Reproduction, Volume 85, Issue 1, 1 July 2011, Pages 157–164,*  
https://doi.org/10.1095/biolreprod.110.084491

---

## Call for Applications

### Call for Applications for Editor(s)-in Chief of Biology of Reproduction

*Biology of Reproduction, Volume 85, Issue 1, 1 July 2011, Page 218,*  
https://doi.org/10.1095/biolreprod.85.1.218

---


## Guides

- Mental health & Fertility
- Obesity & Fertility
- Mind-body practices and Fertility treatment
- Female infertility causes
- LGBTQ fertility

Copyright © 2025 BiolReprod


Close

- Home
- Guides
